# Supplementary material for: Quinolone Resistance Reversion by Targeting the SOS Response
Source: PubMed Central journal article supplement (PMC5635686; doi:10.1128/mbio.00971-17), 2017-10-10

Figure S8A

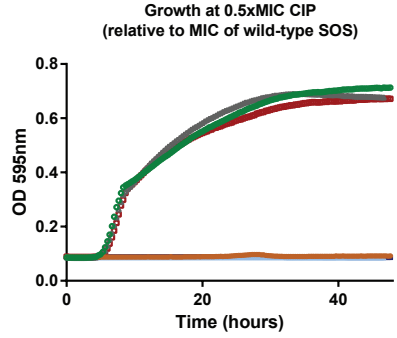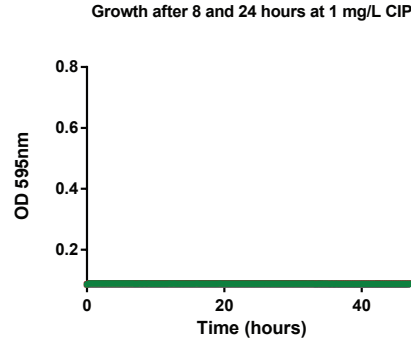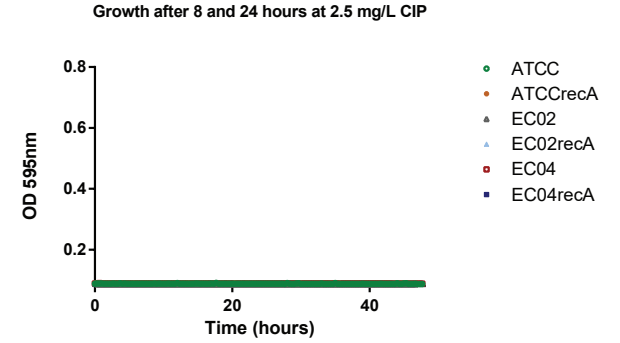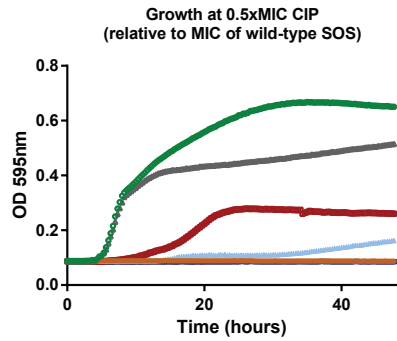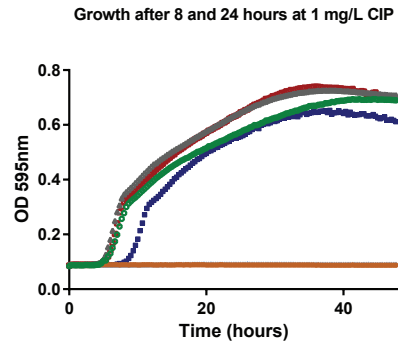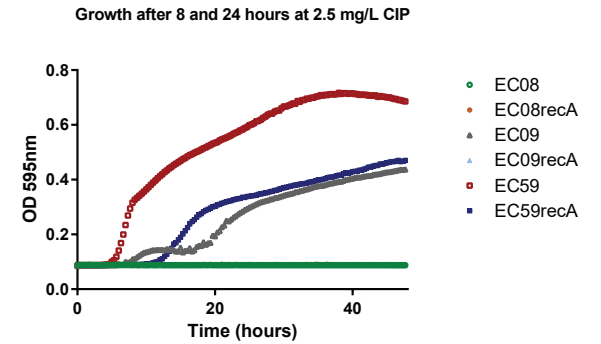

# Figure S8B

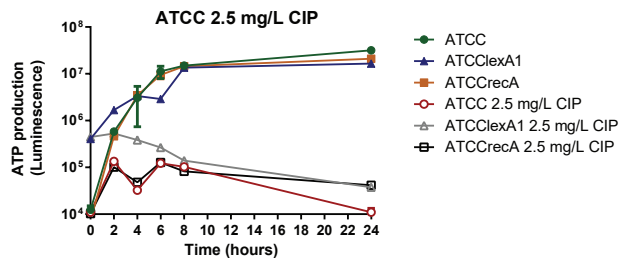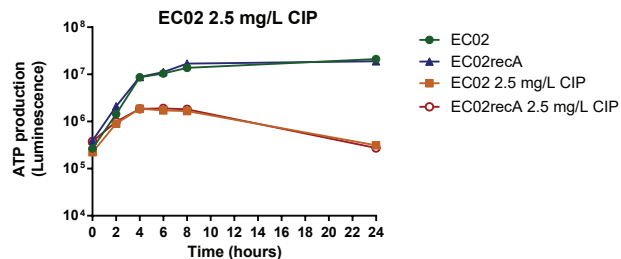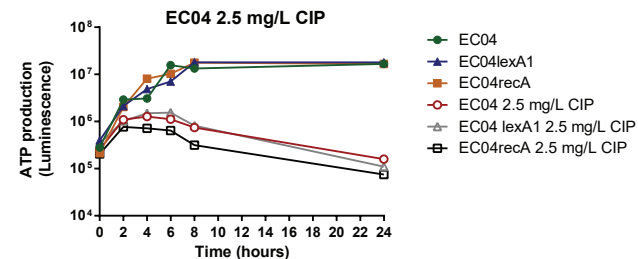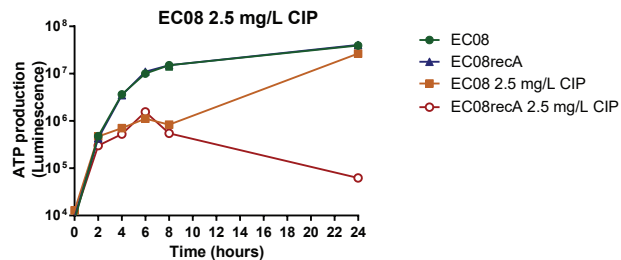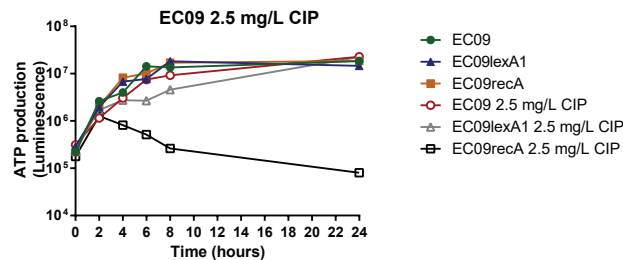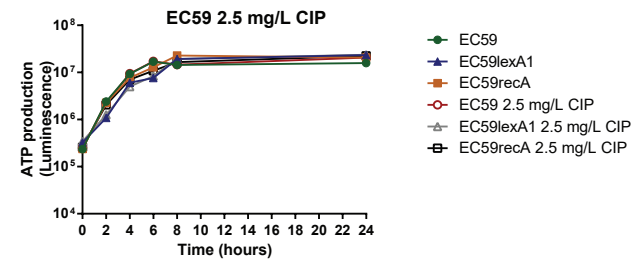

# Figure S8C

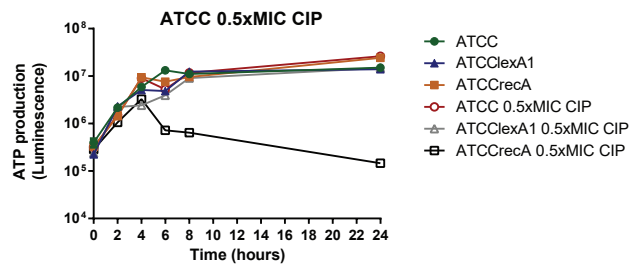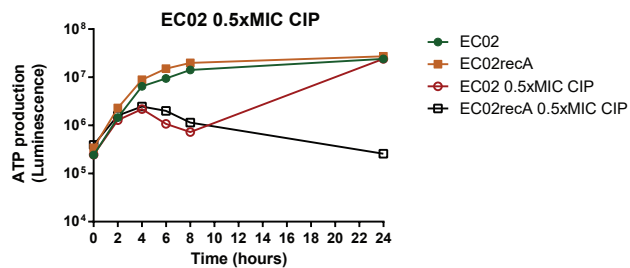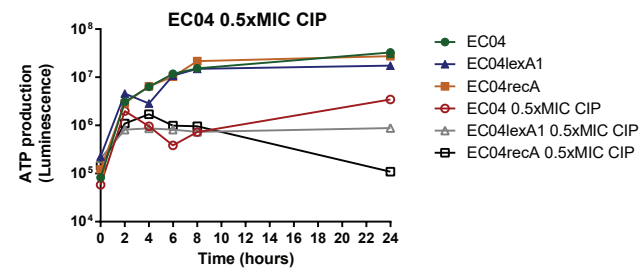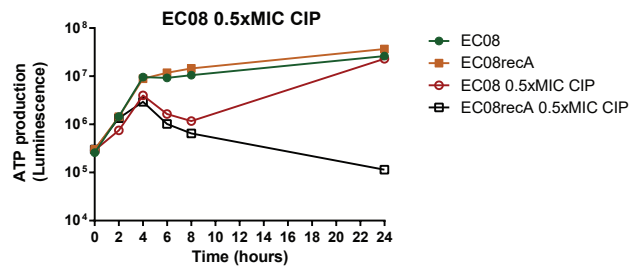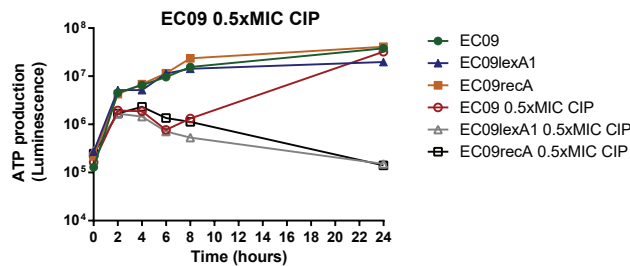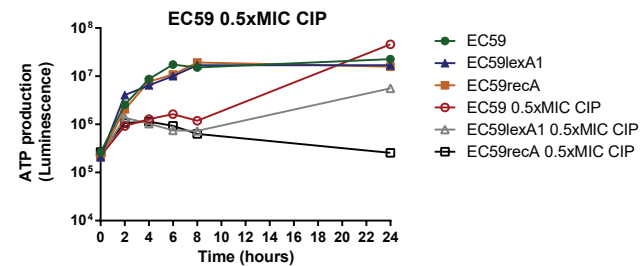

Supplement: mbo005173521sf8.pdf [file mbo005173521sf8.pdf]
