# Supplementary material for: Quinolone Resistance Reversion by Targeting the SOS Response
Source: PubMed Central journal article supplement (PMC5635686; doi:10.1128/mbio.00971-17), 2017-10-10

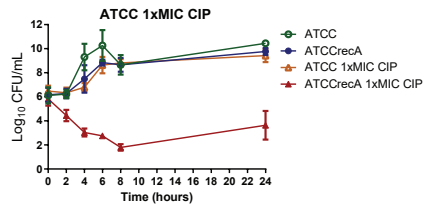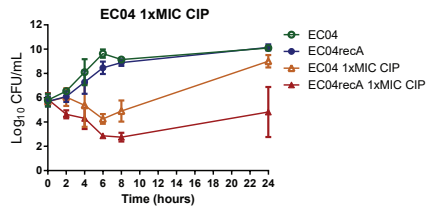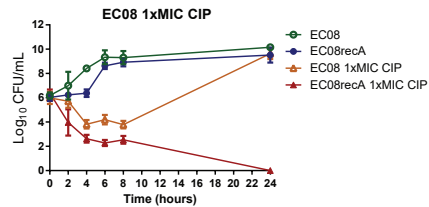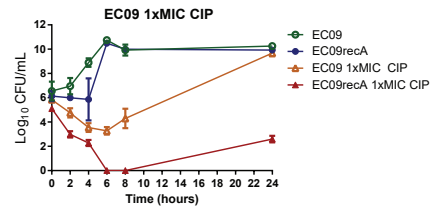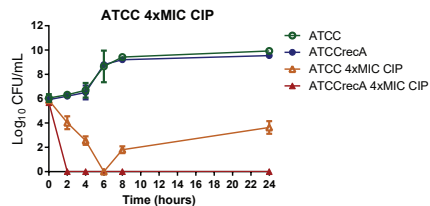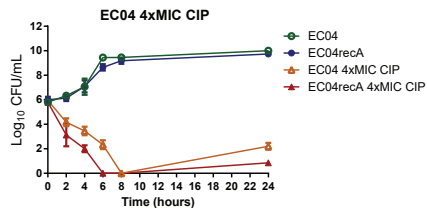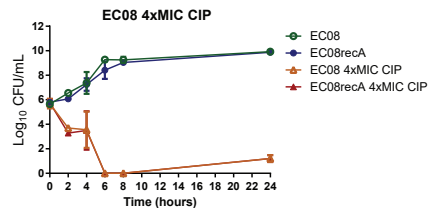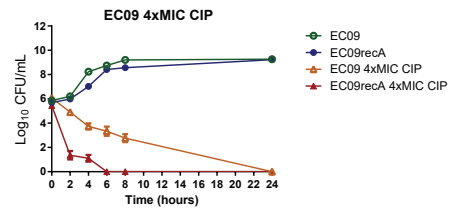

Supplement: mbo005173521sf3.pdf [file mbo005173521sf3.pdf]
